# Supplementary material for: Refuges and host shift pathways of host-specialized aphids Aphis gossypii
Source: PubMed Central journal article supplement (PMC5435715; doi:10.1038/s41598-017-02248-4), 2017-05-17
Supplement: 41598_2017_2248_MOESM1_ESM.pdf [file 41598_2017_2248_MOESM1_ESM.pdf]

**Refuges and host shift pathways of host-specialized aphids *Aphis gossypii***

Xiang-Dong Liu\*, Ting-Ting Xu, Hai-Xia Lei

Department of Entomology, Nanjing Agricultural University, Nanjing 210095, China

\* Correspondence: liuxd@njau.edu.cn. Tel:+86-25-84395242

| Locus   | Primer sequence (5'-3') | Annealing temperature (°C) |
|---------|-------------------------|----------------------------|
| Ago-24  | TTTTCCCGGCACACCGAGT     | 67                         |
|         | GCCAAACTTTACACCCCGC     |                            |
| Ago-53  | TGACGAACGTGGTTAGTCGT    | 67                         |
|         | GGCATAACGTCCTAGTCACA    |                            |
| Ago-59  | GCGAGTGGTATTCGCTTAGT    | 67                         |
|         | GTTACCCTCGACGATTGCGT    |                            |
| Ago-66  | TCGGTTTGGCAACGTCGGGC    | 67                         |
|         | GACTAGGGAGATGCCGGCGA    |                            |
| Ago-69  | CGACTCAGCCCCGAGATT      | 65                         |
|         | ATACAAGCAAACATAGACGGAA  |                            |
| Ago-84  | GACAGTGGTGAGGTTTCAA     | 60                         |
|         | ACTGGCGTTACCTTGTCTA     |                            |
| Ago-89  | GAACAGTGCTCGCAGTCTAT    | 67                         |
|         | GACAGCGTAAACATCGCGGT    |                            |
| Ago-126 | GGTACATTCGTGTCGATT      | 62                         |
|         | TAAACGAAAAAACCACGTAC    |                            |

**Table S1. Primer sequence of microsatellite.**
